# Supplementary material
Source: PubMed Central journal article supplement (PMC10523340)
Supplement: NIHMS1926811-supplement-supporting_information.pdf [file NIHMS1926811-supplement-supporting_information.pdf]

## Supporting Information

### Lipidated $\alpha$ /Sulfono- $\alpha$ -AA heterogeneous peptides as antimicrobial agents for MRSA

Sylvia Singh<sup>a</sup>, Minghui Wang<sup>a</sup>, Ruxian Gao<sup>a</sup>, Peng Teng<sup>a</sup>, Timothy Odom<sup>a</sup>, En Zhang<sup>a,c</sup>, Hai Xu<sup>b</sup>,  
and Jianfeng Cai<sup>a,\*</sup>

<sup>a</sup> Department of Chemistry, University of South Florida, 4202 East Fowler Avenue, Tampa,  
Florida 33620, United States

<sup>b</sup> College of Chemistry and Chemical Engineering, Central South University, Changsha 410083,  
P. R. China

<sup>c</sup> School of Pharmaceutical Sciences, Zhengzhou University, Zhengzhou 450001, PR China.

\*Corresponding Author: [jianfengcai@usf.edu](mailto:jianfengcai@usf.edu)

### HPLC DATA

| Compound Name                       | Retention Time |
|-------------------------------------|----------------|
| C <sub>8</sub> -K-cBB <sub>1</sub>  | 19.44          |
| C <sub>10</sub> -K-cBB <sub>1</sub> | 22.89          |
| C <sub>12</sub> -K-cBB <sub>1</sub> | 24.50          |
| C <sub>14</sub> -K-cBB <sub>1</sub> | 28.04          |
| C <sub>16</sub> -K-cBB <sub>1</sub> | 31.64          |
| C <sub>16</sub> -K-cBB <sub>2</sub> | 35.31          |
| C <sub>16</sub> -K-cBB <sub>3</sub> | 37.70          |
| C <sub>16</sub> -K-bBB <sub>1</sub> | 29.43          |
| C <sub>16</sub> -K-bBB <sub>2</sub> | 31.96          |
| C <sub>16</sub> -K-bBB <sub>3</sub> | 33.21          |
| C <sub>16</sub> -K-hBB <sub>1</sub> | 31.66          |
| C <sub>16</sub> -K-hBB <sub>2</sub> | 34.66          |
| C <sub>16</sub> -K-hBB <sub>3</sub> | 37.19          |

**Table S1: HPLC retention time**

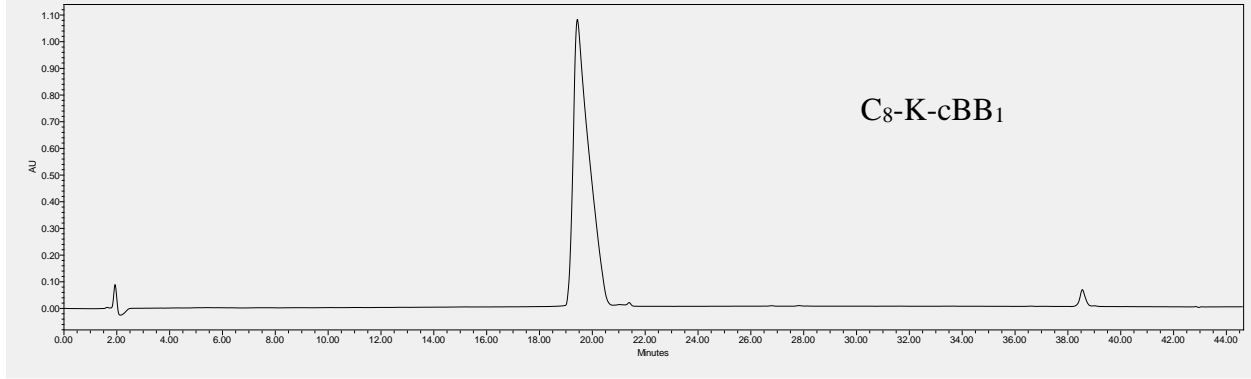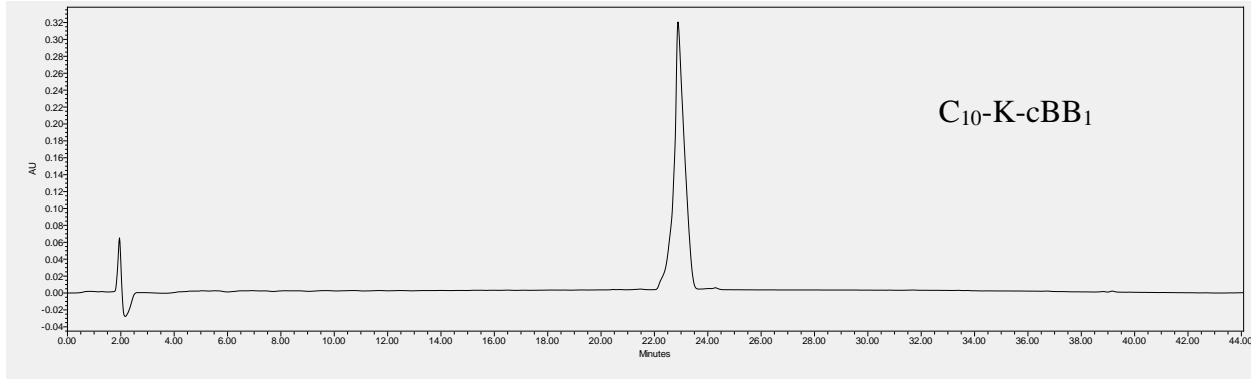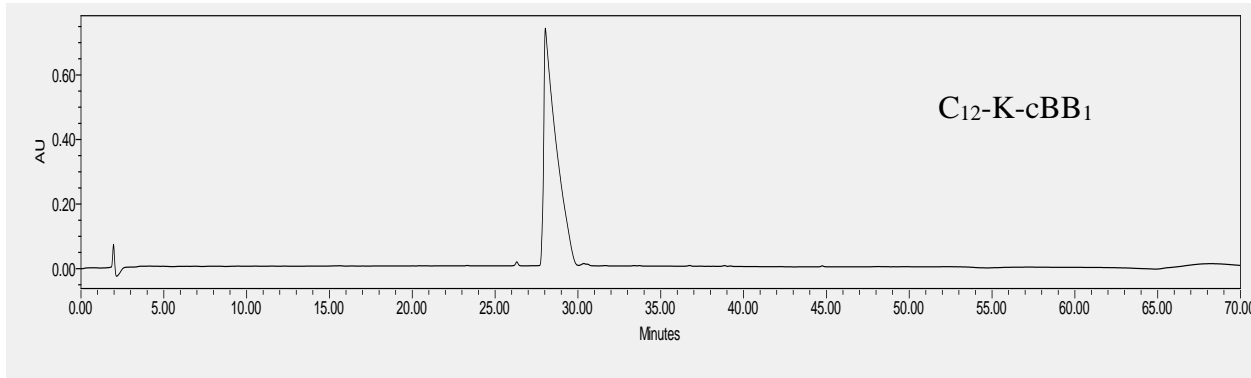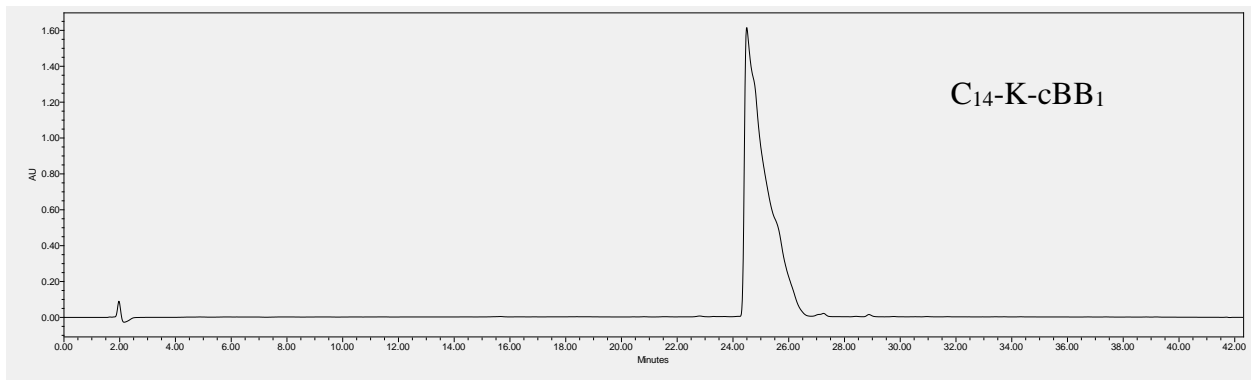

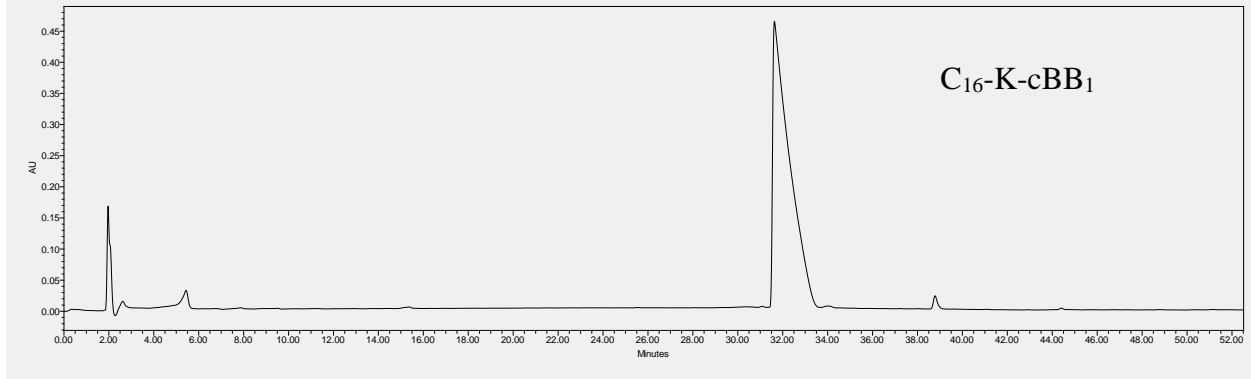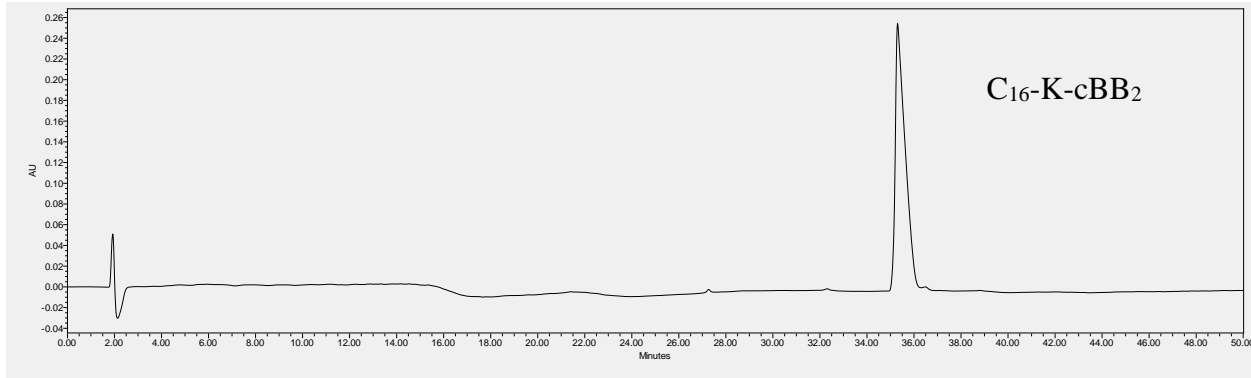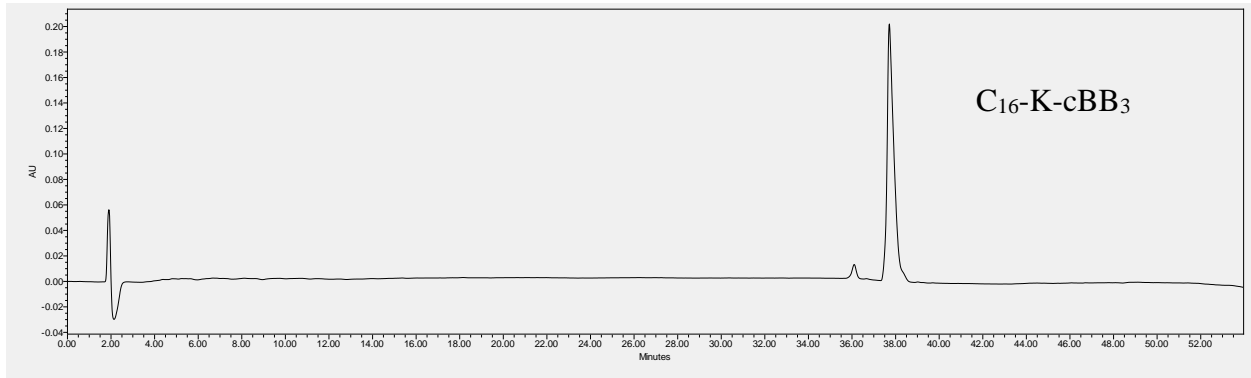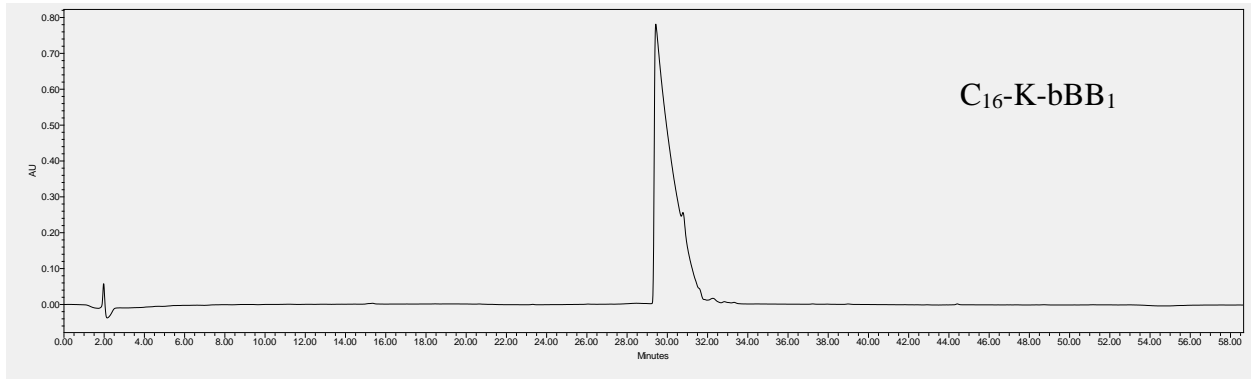

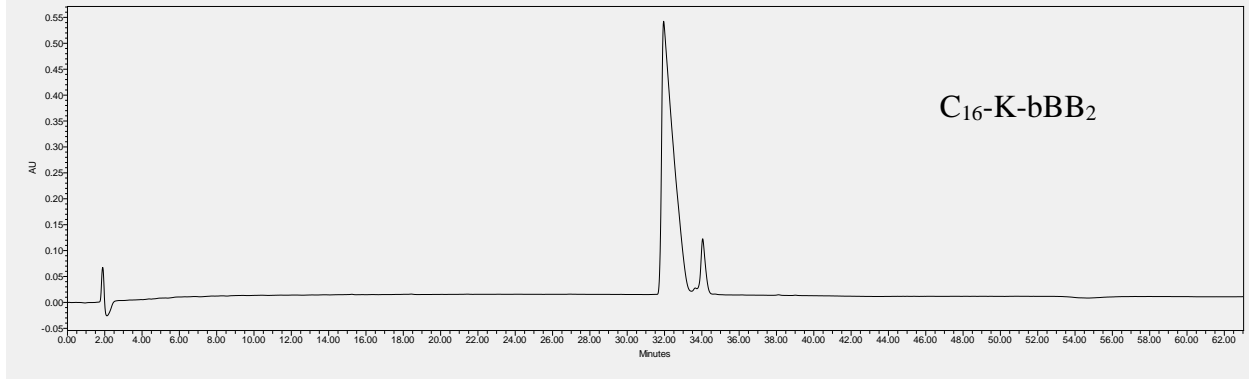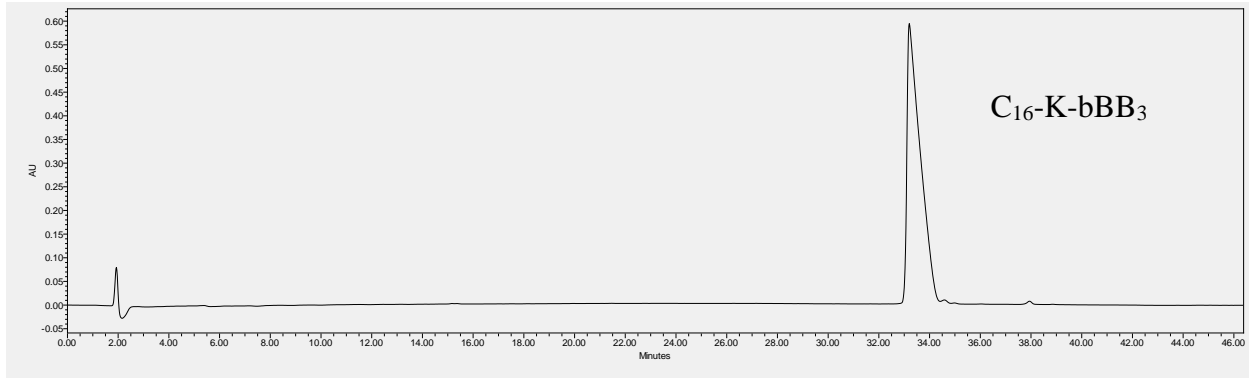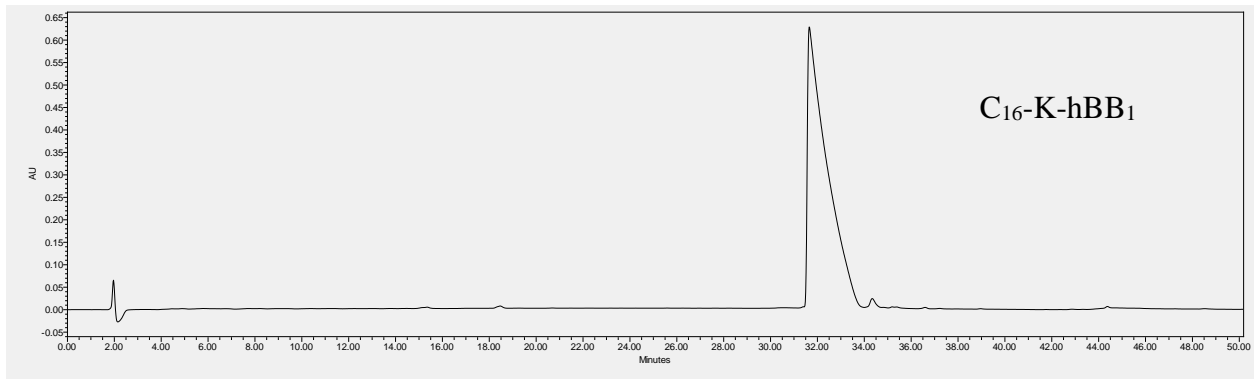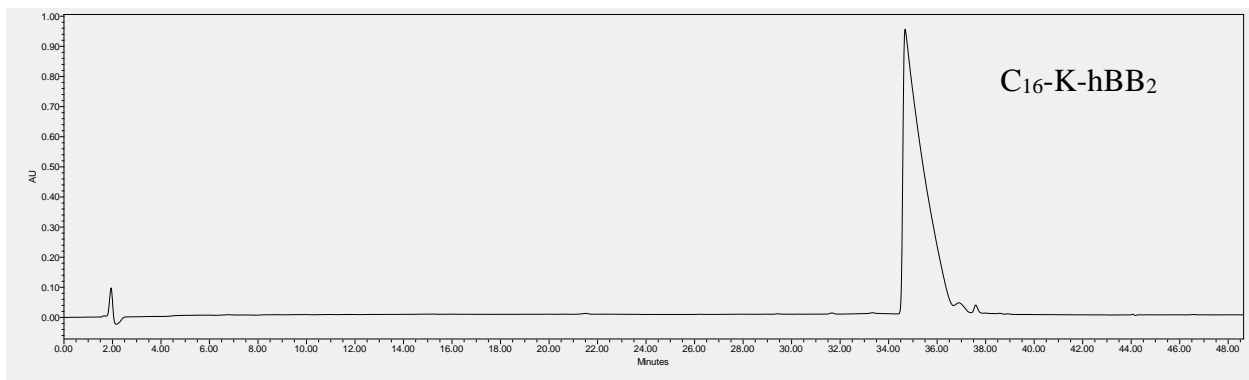

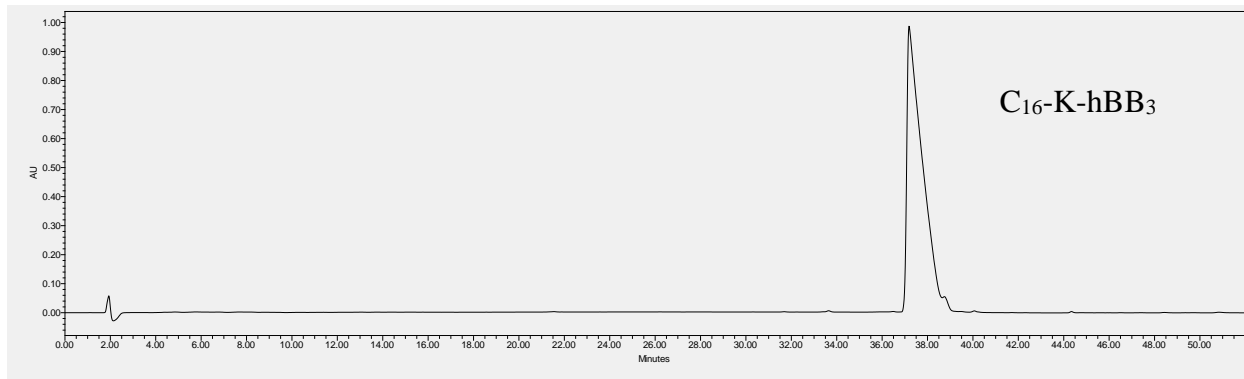

**Figure S1: HPLC Spectra showing purity and retention time of all compounds synthesized**

| <b>Compound Name</b>                | <b>MW</b> | <b>MW (Theoretical)</b> |
|-------------------------------------|-----------|-------------------------|
| C <sub>8</sub> -K-cBB <sub>1</sub>  | 559.26    | 560.15                  |
| C <sub>10</sub> -K-cBB <sub>1</sub> | 587.29    | 588.21                  |
| C <sub>12</sub> -K-cBB <sub>1</sub> | 615.32    | 616.26                  |
| C <sub>14</sub> -K-cBB <sub>1</sub> | 643.35    | 644.31                  |
| C <sub>16</sub> -K-cBB <sub>1</sub> | 671.38    | 672.37                  |
| C <sub>16</sub> -K-cBB <sub>2</sub> | 959.42    | 961.11                  |
| C <sub>16</sub> -K-cBB <sub>3</sub> | 1247.86   | 1249.80                 |
| C <sub>16</sub> -K-bBB <sub>1</sub> | 715.34    | 716.82                  |
| C <sub>16</sub> -K-bBB <sub>2</sub> | 1047.32   | 1050.02                 |
| C <sub>16</sub> -K-bBB <sub>3</sub> | 1379.31   | 1383.22                 |
| C <sub>16</sub> -K-hBB <sub>1</sub> | 637.42    | 637.93                  |
| C <sub>16</sub> -K-hBB <sub>2</sub> | 891.49    | 892.23                  |
| C <sub>16</sub> -K-hBB <sub>3</sub> | 1145.57   | 1146.53                 |

**Table S2: Masses as Shown by Quadrupole Time of Flight Mass Spectrometer and Theoretical Values**
